# Supplementary material for: Unsupervised Machine Learning and Data Mining Procedures Reveal Short Term, Climate Driven Patterns Linking Physico-Chemical Features and Zooplankton Diversity in Small Ponds
Source: MDPI journal article supplement (doi:10.3390/w13091217), 2021-04-28
Supplement: s1 [file s1]

Archive with 1 entries (1 files):
- water-1167609-supplementary.pdf
