# Supplementary material for: Unsupervised Machine Learning and Data Mining Procedures Reveal Short Term, Climate Driven Patterns Linking Physico-Chemical Features and Zooplankton Diversity in Small Ponds
Source: MDPI journal article supplement (doi:10.3390/w13091217), 2021-04-28
Supplement: s1 [file s1 › water-1167609-supplementary.pdf]

## Article

# Unsupervised Machine Learning and Data Mining Procedures Reveal Short Term, Climate Driven Patterns Linking Physico-Chemical Features and Zooplankton Diversity in Small Ponds

Nicolò Bellin \*, Erica Racchetti, Catia Maurone, Marco Bartoli and Valeria Rossi

Department of Chemistry, Life Sciences and Environmental Sustainability, University of Parma, Viale delle Scienze 11/A, I-43124 Parma, Italy; erica.racchetti@unipr.it (E.R.); geomcatia@hotmail.it (C.M.); marco.bartoli@unipr.it (M.B.); valeria.rossi@unipr.it (V.R.)

\* Correspondence: nicolo.bellin@unipr.it; Tel.: +39-0521-905612

**Table S1.** Reported the latitude and longitude in WGS84 coordinate reference system of the 24 ponds under study, the number of years since origin.

| Id | Ponds                 | Age | Latitude  | Longitude |
|----|-----------------------|-----|-----------|-----------|
| 1  | Pastore3              | 218 | 10.324003 | 45.000660 |
| 2  | Pastore1              | 69  | 10.320438 | 45.000116 |
| 3  | Pastore4              | 218 | 10.328615 | 45.000381 |
| 4  | Temporanea            | 5   | 10.322755 | 45.003484 |
| 5  | Bosco Braca           | 69  | 10.388445 | 44.994899 |
| 6  | Pavarini              | 47  | 10.391577 | 44.997471 |
| 7  | Bosco Valloni         | 218 | 10.355710 | 44.985057 |
| 8  | San Giorgio           | 219 | 10.365307 | 44.987526 |
| 9  | Forche                | 218 | 10.358832 | 45.000701 |
| 10 | Martignana            | 219 | 10.363053 | 44.991424 |
| 11 | Santa Maria Maddalena | 300 | 10.329035 | 45.014149 |
| 12 | Bosco Bodini          | 46  | 10.313195 | 44.995203 |
| 13 | Cascina Mortara       | 35  | 10.313565 | 44.999700 |
| 14 | Bosco Piazza          | 218 | 10.305016 | 45.002634 |
| 15 | Cascina Tavernelle    | 300 | 10.309694 | 45.014147 |
| 16 | Vecchio               | 300 | 10.288462 | 45.014119 |
| 17 | Bazzi                 | 64  | 10.284595 | 45.011462 |
| 18 | Motta                 | 219 | 10.256552 | 45.052146 |
| 19 | Ronchetto             | 218 | 10.240978 | 45.033728 |
| 20 | Rita                  | 300 | 10.242026 | 45.052845 |
| 21 | Bicocca               | 300 | 10.228081 | 45.048045 |
| 22 | Pescaroli West        | 218 | 10.194924 | 45.046146 |
| 23 | Pescaroli East        | 218 | 10.196969 | 45.044955 |
| 24 | Sabbie                | 300 | 10.327130 | 45.006925 |

**Table S2.** Showed the physical and chemical environmental features measured for each pond, the unity of measure, the symbols adopted in the study and the laboratory assay or the method of estimation.

| Enviromental feature        | Type     | Unity of measure                             | Symbol                       | Laboratory Assay – Method of estimation   |
|-----------------------------|----------|----------------------------------------------|------------------------------|-------------------------------------------|
| Water temperature           | Physical | Celsius (°C)                                 | wT                           | Multiparameters probe (YSI model 566 MPS) |
| pH                          | Chemical | dimensionless                                | pH                           | Multiparameters probe (YSI model 566 MPS) |
| Oxygen                      | Chemical | milligrams per liter (mg.l <sup>-1</sup> )   | O <sub>2</sub>               | Multiparameters probe (YSI model 566 MPS) |
| Conductivity                | Chemical | microsiemens per meter (μS.m <sup>-1</sup> ) | ES                           | Multiparameters probe (YSI model 566 MPS) |
| Dissolved inorganic carbon  | Chemical | millimolars (mM)                             | DIC                          | Anderson et al., 1986                     |
| Ammonia                     | Chemical | milligrams per liter (mg.l <sup>-1</sup> )   | NH <sub>4</sub> <sup>+</sup> | A.P.H.A, 1981                             |
| Soluble reactive phosphorus | Chemical | milligrams per liter (mg.l <sup>-1</sup> )   | SRP                          | Valderrama et al., 1977                   |
| Nitrate                     | Chemical | milligrams per liter (mg.l <sup>-1</sup> )   | NO <sub>3</sub> <sup>-</sup> | Rodier, 1987                              |
| Chlorophyll a               | Chemical | micrograms per liter (μg.l <sup>-1</sup> )   | Chla                         | A.P.H.A, 1981                             |
| Reactive silica             | Chemical | milligrams per liter (mg.l <sup>-1</sup> )   | SiO <sub>2</sub>             | A.P.H.A, 1981                             |
| Depth                       | Physical | meters (m)                                   | Depth                        | D'Auria & Zavagno, 1999                   |
| Perimeter                   | Physical | meters (m)                                   | Perimeter                    | D'Auria & Zavagno, 1999                   |

**Table S3.** Showed the descriptive statical parameters Range, Mean, Median and Standard deviation (SD) of the nine chemical and the three physical enviromental features, in 2014 and 2015. Water temperature (wT) was expressed in Celsius (°C); Oxygen (O<sub>2</sub>), ammonia (NH<sub>4</sub><sup>+</sup>), soluble active phosphorus (SRP), nitrate (NO<sub>3</sub><sup>-</sup>) and soluble reactive silica (SiO<sub>2</sub>) were expressed in mg.l<sup>-1</sup>; dissolved inorganic carbon (DIC) was expressed in mM and clorophyll a (Chla) in µg.l<sup>-1</sup>. Depth and perimeter were expressed in meters (m).

| Enviromental feature         | Range      | Mean  | Median | SD     |
|------------------------------|------------|-------|--------|--------|
| wT                           | 10–27.7    | 21.31 | 21.40  | 4.18   |
| pH                           | 6.9–9.6    | 7.75  | 7.70   | 0.45   |
| O <sub>2</sub>               | 0–31.6     | 7.07  | 6.20   | 4.84   |
| ES                           | 180–961    | 532.6 | 494    | 235.65 |
| DIC                          | 1.28–11.73 | 4.71  | 4.23   | 2.78   |
| NH <sub>4</sub> <sup>+</sup> | 0–3.44     | 0.27  | 0.09   | 0.57   |
| SRP                          | 0–1.59     | 0.09  | 0.02   | 0.25   |
| NO <sub>3</sub> <sup>-</sup> | 1–1.09     | 0.16  | 0.07   | 0.23   |
| Chla                         | 0–11.20    | 2.86  | 1.95   | 2.78   |
| SiO <sub>2</sub>             | 0.01–24.41 | 6.21  | 3.31   | 6.39   |
| Depth                        | 0.70–7.50  | 4.20  | 4.40   | 1.64   |
| Perimeter                    | 16–408     | 210.1 | 196    | 75.68  |

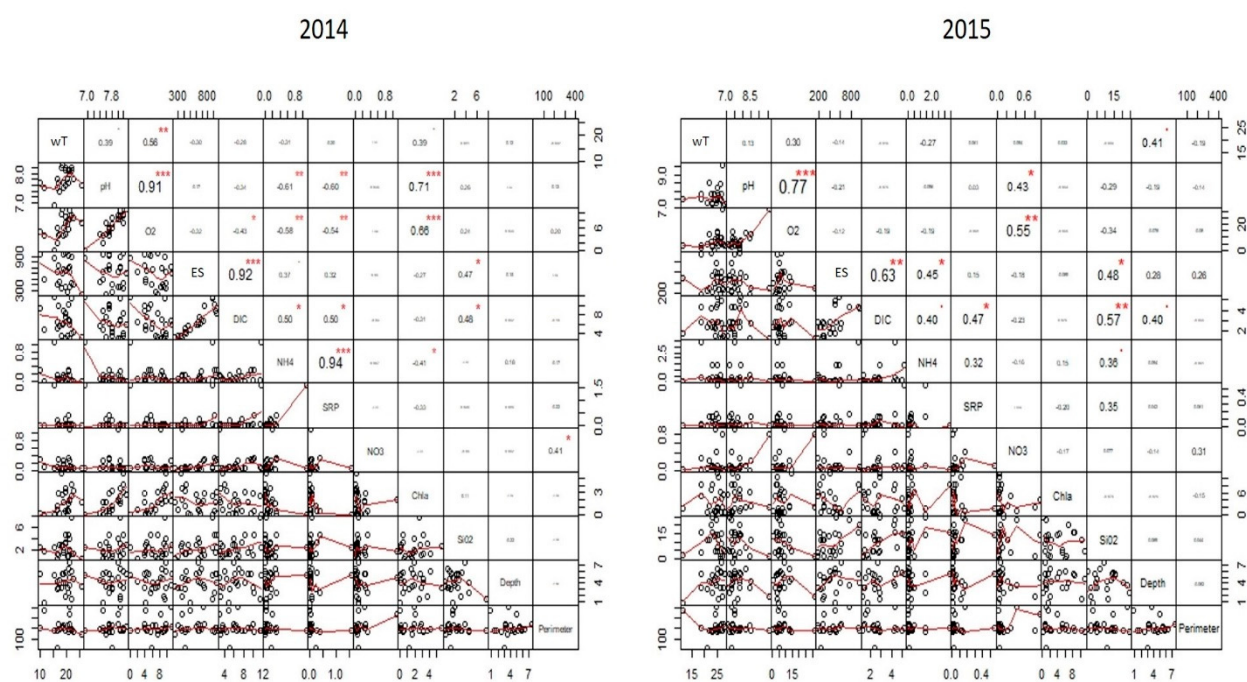

**Figure S1.** The panels showed the correlation matrix of the environmental features for the years 2014 and 2015. The diagonal showed the labels of the eleven environmental features: water temperature (wT), pH, Oxygen (O<sub>2</sub>), conductivity (EC), dissolved inorganic carbon (DIC), ammonia (NH<sub>4</sub>), soluble reactive phosphorus (SRP), nitrate (NO<sub>3</sub>), chlorophyll a (Chla), silica (SiO<sub>2</sub>), depth and perimeter. In the upper diagonal part was presented the Pearson correlation coefficient between pairs of variables proportional in size to the magnitude of the value, the stars showed the significance level of the correlation test (\* p < 0.05, \*\* p < 0.001, \*\*\* p < 0.0001). The lower diagonal part showed the scatterplot between pairs of variables. The red line reported the lowest smoother.

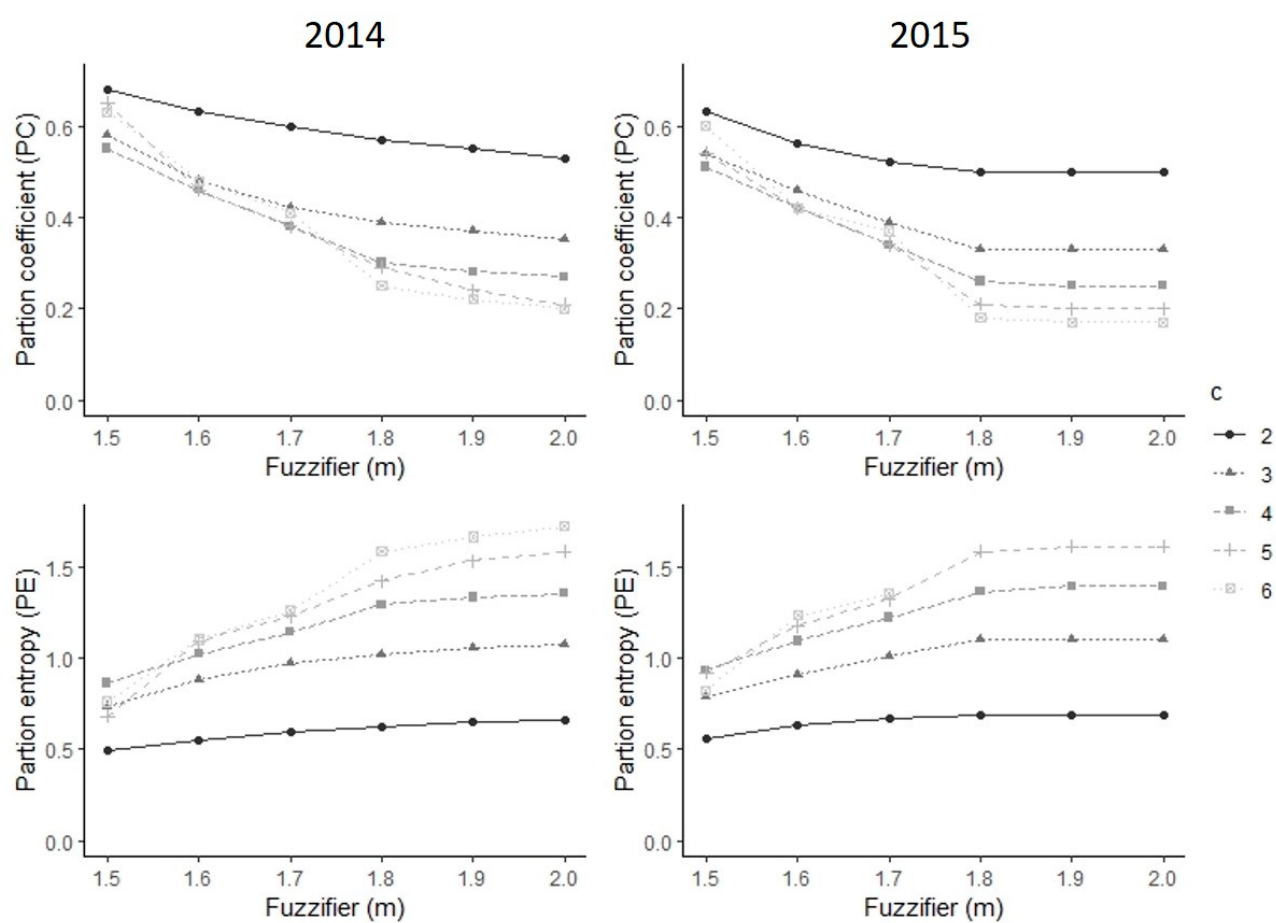

**Figure S2.** Values of partition coefficient (PC) and partition entropy (PE) for the years 2014 (left panel) and 2015 (right panel). For each plot, the grey scale colors, the point's shape and the geometry of the lines were relative to the different number of clusters (c) in the range 2–6.

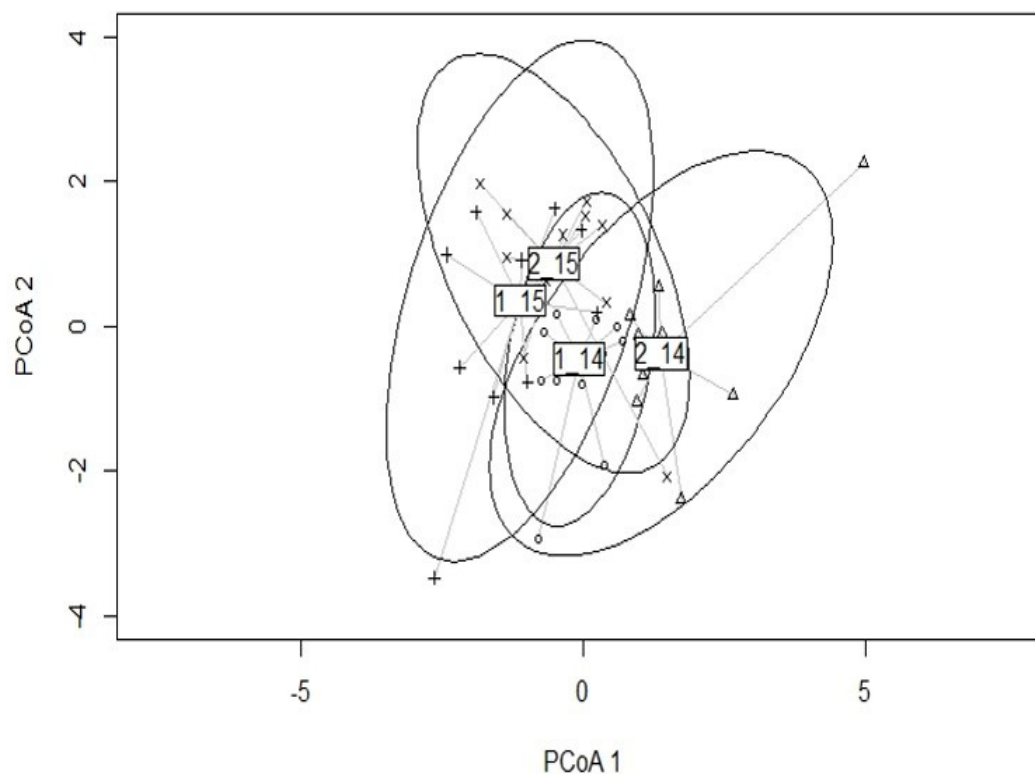

**Figure S3.** Showed the ordination plot of the average euclidean distance of the scaled environmental features of the water chemistry, from the median of each cluster found by fuzzy c-means. Each ponds were reported on the first two principal coordinate axis and the symbols were relative to the ponds of Cluster 1 ( $\circ$ ) and Cluster 2 ( $\Delta$ ) in 2014, Cluster 1 (+) and Cluster 2 ( $\times$ ) in 2015. The ellipses represent 1 standard deviation of the euclidean distances from the median of the clusters. The PERMIDISP analysis after permutation test, revealed not significant difference between groups in habitat heterogeneity.

**Table S4.** Showed the results of Kolmogorov-Smirnov test between distributions of beta diversity indices after the resampling procedure. The stars represents the p-value (\*  $p < 0.05$ , \*\*  $p < 0.01$ , \*\*\*  $p < 0.001$  and \*\*\*\*  $p < 0.0001$ ).

| Beta diversity index | 2014                | 2015                | 2014–2015    |
|----------------------|---------------------|---------------------|--------------|
|                      | Cluster 1–Cluster 2 | Cluster 1–Cluster 2 |              |
| $\beta$ SOR          | D = 0.75****        | D = 0.60****        | D = 0.39**** |
| $\beta$ SNE          | D = 0.41****        | D = 0.16****        | D = 0.31**** |
| $\beta$ SIM          | D = 0.81****        | D = 0.43****        | D = 0.37**** |

**Table S5.** Showed the association rules from presence/absence data mined with frequent pattern growth algorithm, in 2014 and 2015. The association rules highlight the frequency and the correlations between taxa co-occurrences. For each rule were reported the quantitative measures of interest: support, confidence and lift.

| N° | Association rules                                                             | Support | Confidence | Lift |
|----|-------------------------------------------------------------------------------|---------|------------|------|
| 1  | <i>Pleuroxus</i> , <i>Cyclopoida</i> ,<br>Calanoida =><br><i>Simocephalus</i> | 0.10    | 1.00       | 3.92 |
| 2  | <i>Pleuroxus</i> , <i>Cyclopoida</i><br>=> <i>Simocephalus</i>                | 0.10    | 0.83       | 3.26 |
| 3  | <i>Daphnia</i> , <i>Simocephalus</i><br>=> Calanoida                          | 0.10    | 1.00       | 1.52 |
| 4  | <i>Chydorus</i> , <i>Pleuroxus</i> =><br>Calanoida                            | 0.10    | 1.00       | 1.52 |
| 5  | <i>Simocephalus</i> , <i>Pleuroxus</i><br>=> Calanoida                        | 0.17    | 1.00       | 1.52 |
| 6  | <i>Pleuroxus</i> => Calanoida                                                 | 0.25    | 0.85       | 1.29 |
| 7  | <i>Simocephalus</i> ,<br><i>Cyclopoida</i> =><br>Calanoida                    | 0.12    | 0.85       | 1.29 |
| 8  | <i>Simocephalus</i> =><br>Calanoida                                           | 0.21    | 0.83       | 1.26 |
| 9  | <i>Chydorus</i> , <i>Cyclopoida</i><br>=> Calanoida                           | 0.10    | 0.83       | 1.26 |

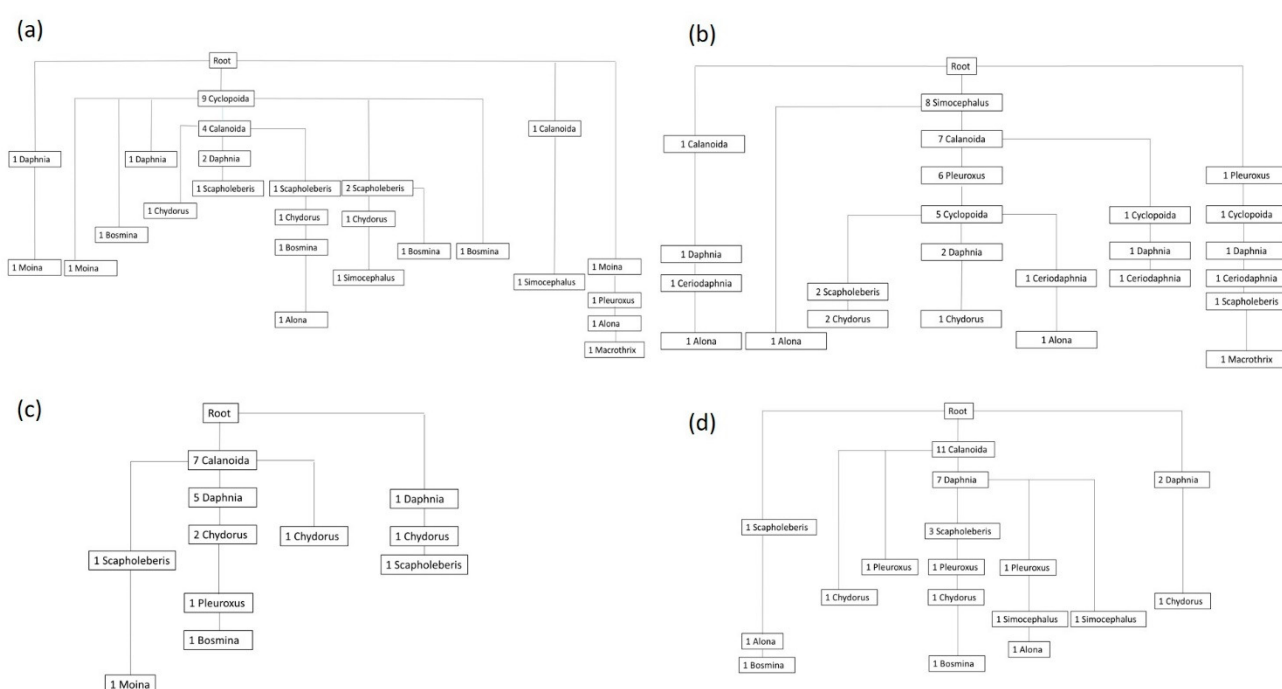

**Figure S4.** Frequent pattern trees (FPt) for the community structure in Cluster 1 (a) and 2 (b) in 2014 and in Cluster 1 (c) and 2 (d) in 2015. Each node represents a specific taxon and its absolute frequency (number of ponds where the taxon was found). The branches join the co-occurrence of taxa.
